# Atomic force microscopy reveals the role of vascular smooth muscle cell elasticity in hypertension

Yi Zhu<sup>1,2</sup>

<sup>1</sup>Department of Medicine, University of Alabama-Birmingham, Birmingham, AL, 35294

<sup>2</sup>Dalton Cardiovascular Research Center, University of Missouri-Columbia, Columbia, MO, 65211

Email address: yalezhuphd@gmail.com

## Abstract

The vascular smooth muscle cell (VSMC) mechanical properties not only provide intrinsic cellular functions, but also influence many vascular and circulation functions in physiology. In this report, the VSMCs of thoracic aorta from 16 week age Wistar-Kyoto normotensive rats (WKY) and spontaneously hypertensive rats (SHR) were used as research subjects to reveal hypertension mechanism at a single cell level using atomic force microscopy (AFM). The apparent elastic modulus was significantly increased in VSMCs from SHRs compared to those from WKYs. Treatment with cytochalasin D (CD), ML7, Y27632 and lysophosphatidic acid (LPA) modulated VSMC stiffness of WKYs and SHRs. A spectral analysis approach was applied to further investigate the time-dependent change in VSMC elasticity of WKYs and SHRs. This report demonstrated the efficacy of real-time analysis of VSMC elasticity by AFM nano-indentation, and revealed real-time functional differences in biomechanical characteristics of VSMCs with drug treatments.

**Key words:** Atomic force microscopy; vascular smooth muscle cell; elasticity; Wistar-kyoto normotensive rat (WKY); Spontaneously hypertensive rat (SHR)

## 28 LIST OF ABBREVIATIONS

|    |               |                                                                                                           |
|----|---------------|-----------------------------------------------------------------------------------------------------------|
| 29 | AFM           | atomic force microscopy                                                                                   |
| 30 | $\alpha$ -SMA | $\alpha$ -smooth muscle actin                                                                             |
| 31 | CD            | Cytochalasin D                                                                                            |
| 32 | DMEM          | Dulbecco's Modified Eagle's medium                                                                        |
| 33 | ECM           | extracellular matrix                                                                                      |
| 34 | FBS           | fetal bovine serum                                                                                        |
| 35 | HEPES         | 4-(2-hydroxyethyl)-1-piperazineethanesulfonic acid                                                        |
| 36 | LPA           | lysophosphatidic acid                                                                                     |
| 37 | ML7           | Hexahydro-1-[(5-iodo-1-naphthalenyl) sulfonyl]-1 <i>H</i> -1, 4-diazepine                                 |
| 38 | MLCK          | myosin light chain kinase                                                                                 |
| 39 | ROCK          | Rho-associated protein kinase                                                                             |
| 40 | SHR           | spontaneously hypertensive rat                                                                            |
| 41 | VSMC          | vascular smooth muscle cell                                                                               |
| 42 | WKY           | wistar-kyoto normotensive rat                                                                             |
| 43 | Y27632        | (1 <i>R</i> , 4 <i>r</i> )-4-(( <i>R</i> )-1-aminoethyl)- <i>N</i> -(pyridin-4-yl) cyclohexanecarboxamide |

44

45

46

47

48

## 49 **1. Introduction**

50 Vascular smooth muscle cells (VSMCs) locate blood vessel medial layer as a main  
51 component and bear mechanical stress and pressure from blood flow, and sustain vascular tone  
52 and resistance. A number of recent studies have demonstrated that changes in a cell's elastic  
53 characteristics can affect its response to the external mechanical force (Hill M.A., et al., 2016;  
54 Dhar S., et al., 2017). The single-cell mechanical property and behavior of VSMC is chiefly  
55 considered to play a crucial role in the development of vascular diseases, and atomic force  
56 microscopy (AFM) is currently the most wonderful tools for determining this interaction (Zhu  
57 W., et al., 2018; Leloup A.J.A., et al., 2019; Sanyour H.J., et al., 2020).

58 The VSMC intrinsic properties not only perform a normal cellular function to sustain  
59 and support vascular geometric architecture, but also take some important actions to participate  
60 the regulation of biophysical and biochemical properties for blood vessel (Jia G., et al., 2015;  
61 Zhang J., et al., 2016; Yang J., et al., 2017). With the development and applications of AFM  
62 technology, people gradually concentrate their research on reconstituted tissues and single cell  
63 detections (Huang H., et al., 2018; Li N., et al., 2018; Zhou Z., et al., 2020). Hypertension is a  
64 common age-related vascular disease, and many factors can induce age-related vascular  
65 dysfunctions and diseases (Touyz R.M., et al., 2018). However, the detailed mechanisms that  
66 induce hypertension still need to be elucidated. Currently, people attempt to analyze and reveal  
67 the hypertension mechanism in single molecule and single cell level (Huang H., et al., 2018; Zhu  
68 Y., et al., 2018 and 2019). The cytoskeleton contents, the polymerization and arrangement of  
69 actin filaments were directly responsible for the VSMC elasticity (Shen K., et al., 2019; Rickel  
70 A.P., et al., 2020). The investigation in single cell level can supplement studies on complicated  
71 living organisms or an intact tissue to determine the related pathways that regulate cell elasticity  
72 and adhesion (Zhou N., et al., 2017 a and b). Furthermore, cells are in micro-scales and easy to  
73 break, and AFM provides a probability to manipulate VSMC at an individual cell level due to its  
74 nano-sensitivity under liquid environment (Sanyour H., et al., 2018, 2019 and 2020). The  
75 experimental medicines are administered in micro-volume by a pipette and ensured drugs to  
76 diffuse and aim the measured cells, and people can fully and perfectly employ AFM to perform a  
77 continuous real-time measurement in the absence and presence of drugs on a single cell. The  
78 single spectral analysis is an approach to reveal mathematical decomposition of the elasticity  
79 waveform and further demonstrates the underlying molecular mechanism (Hong Z., et al., 2015;

80 Sehgel N.L., et al., 2015a and b). The drug cytochalasin D (CD) depolymerizes and breaks apart  
81 actin filaments, and the drug ML7 dephosphorylates myosin light chain to inhibit the  
82 establishment of actin binding with myosin (Zhang J., et al., 2016). Additionally, the drug  
83 Y27632 inhibits the Rho-associated protein kinase (ROCK) and the drug lysophosphatidic acid  
84 (LPA) enhances integrin proteins to adhere the extracellular matrix (ECM) and activates Rho  
85 kinase to phosphorylate myosin light chain kinase (MLCK) (Staiculescu M.C., et al., 2014;  
86 Turner C.J., 2015). In this report we chose these drugs using AFM to measure the stiffness of  
87 thoracic aortic VSMCs *in vitro*. An investigation was taken to study and reveal the real-time  
88 record of single VSMC mechanical property and behavior. Moreover, we analyzed and  
89 interpreted the oscillatory waveforms of VSMC elasticity for various drug treatments to reveal  
90 the underlying cellular and molecular mechanisms of VSMC stiffness in hypertension by a  
91 spectral analysis approach.

92

## 93 **2. Materials and Methods**

### 94 **2.1 Vascular smooth muscle cell isolation, cell culture, and treatments**

95 Male WKYs and SHR rats at 16–18 weeks of age were utilized in this study. All animal  
96 procedures were done under the *Guide for the Care and Use of Laboratory Animals* (NIH 85-23,  
97 revised 2011). Primary VSMCs from thoracic aorta of three experimental WKY and SHR rats  
98 were enzymatically isolated and cultured in Dulbecco's Modified Eagle's medium (DMEM) with  
99 10% fetal bovine serum (FBS), 10 mmol/L HEPES, 2 mmol/L L-glutamine, 1 mmol/L sodium  
100 pyruvate, 100 U/mL penicillin, 100 µg/mL streptomycin, and 0.25 µg/mL amphotericin B and  
101 used at passages 2 to 4 (Sanyour H.J., et al., 2020).

### 102 **2.2 VSMC image and stiffness measured by AFM**

103 Single VSMC image and lively measurements of cell elasticity were operated in contact  
104 mode by an AFM instrument, which is a Bioscope System (Model IVa, Veeco Metrology Inc.,  
105 Santa Barbara, CA) mounted on an Olympus IX81 microscope (Olympus Inc., NY). The  
106 employed AFM probes were silicon nitride microlevers (Model micro lever cantilever, Veeco  
107 Metrology Inc., Santa Barbara, CA; spring constant ranging 10-30 pN/nm) and purchased from  
108 Veeco Metrology Inc. (Santa Barbara, CA). The AFM tip was put in the mid-site between  
109 VSMC margin and the nucleus for nano-indentation to measure WKY and SHR elasticity. The  
110 AFM probe was continuously indented 2 minute to collect force curves for determining the mean

111 stiffness of individual WKY and SHR VSMC, and the experimental VSMCs from three rats  
112 were assessed then averaged together for the stiffness of WKYs and SHRs. The force curves  
113 were interpreted using proprietary software NForceR (registration number TXu1-328-659), and  
114 the VSMC elastic modulus was translated from these force curves into Young's modulus using a  
115 modified Hertz model. The calculation of the elastic modulus was:

$$F = \frac{2E\delta^2}{\pi(1-\nu^2)} \tan(\alpha)$$

116  
117 where the indentation force (F) was stated and described using Hooke's law ( $F = \kappa\Delta x$ ,  $\kappa$  and  $\Delta x$   
118 denote the AFM probe's spring constant and the probe's apparent deflection). The indentation  
119 depth ( $\delta$ ) is identified from the difference in the AFM piezo movement in z direction and the  
120 AFM probe deflection. E is the Young's modulus of experimental cell as the value of elasticity,  
121 and  $\nu$  denotes 0.5 for cell as the Poisson ratio. The numerical  $\alpha$  is the semi-included angle of the  
122 cone for a pyramidal tipped probe and determined by the probe shape.

### 123 **2.3 Dynamic stiffness in single VSMC measurement by AFM**

124 The experimental VSMCs were nano-indented for the duration of 30 minute to examine  
125 the temporal characteristics of the cell stiffness, and then VSMCs were treated in micro-volume  
126 by a pipette with CD (10  $\mu\text{mol/L}$ ; Sigma, St. Louis, MO), with ML7 (10  $\mu\text{mol/L}$ ; Sigma, St.  
127 Louis, MO), with Y27632 (5 $\mu\text{mol/L}$ ; Sigma, St. Louis, MO), with LPA (2  $\mu\text{mol/L}$ ; Sigma, St.  
128 Louis, MO) for another 30 minute continuous AFM investigation. The curves were continuously  
129 recorded and collected during the whole measuring procedure, and applied to determine elastic  
130 stiffness, absence and presence of drugs. A spectral analysis procedure was exploited for analysis  
131 and following translation of the oscillation waveforms for elasticity data, and linear trends were  
132 evaluated and subtracted from each series ahead of a spectral analysis. To reveal the average  
133 group behavior of the oscillations, three values of amplitude, frequency and phase for every  
134 experimental subject were further investigated and averaged: phases ( $\Phi$ ) as a simple mean;  
135 frequencies (f) were converted to periods (1/f) ahead of averaging; amplitudes (A) were log<sub>10</sub>-  
136 transformed before averaging the mean. The mean period and mean log-amplitude were then  
137 transformed back to frequency and amplitude. A composite time series for each treatment set  
138 was constructed as:

$$y(t) = \bar{A}_1 \text{Sin} \left( 2\pi \bar{f}_1 t + \bar{\phi}_1 \right) + \bar{A}_2 \text{Sin} \left( 2\pi \bar{f}_2 t + \bar{\phi}_2 \right) + \bar{A}_3 \text{Sin} \left( 2\pi \bar{f}_3 t + \bar{\phi}_3 \right) + \bar{b}_1 t + \bar{b}_0$$

139

140 where  $b_1$  and  $b_0$  denote respectively the slope and intercept of the linear trend, and the bar above  
141 each component indicates the average value (Zhu Y., et al., 2018). A brief explanation for the  
142 singular spectrum analysis equation and application was provided in this report, and we detail  
143 stated and described the measurement of dynamic stiffness by AFM in single VSMC and the  
144 analysis of oscillation waveform by singular spectrum analysis.

## 145 **2.4 Statistical analysis**

146 Data are expressed as mean  $\pm$  SEM for the number of samples reported in this report.  
147 Statistically significant differences between WKYs and SHRs were determined by Student's t-  
148 test. A value of  $P < 0.05$  was considered a significant difference.

## 149 **3. Results and Discussion**

### 150 **3.1 VSMC AFM image and topography**

151 The SHR developed from WKY rat as an animal model for specific studies of  
152 cardiovascular disease, thus we analyzed and compared heights and topographic images of  
153 VSMCs isolated from thoracic aorta of WKYs (n=4, from 3 rats) and SHRs (n=5, from 3 rats).  
154 The VSMC surface areas of WKYs vs. SHRs were  $10695 \pm 339 \mu\text{m}^2$  vs.  $12380 \pm 483 \mu\text{m}^2$ , and the  
155 VSMC surface area of SHRs was significantly larger than WKYs ( $p < 0.05$ ). For the height  
156 measurement, we set AFM to predetermine the line across the cell and take a 30 second period  
157 reading. Waited 600 seconds (10 minutes), and started recording line scans of height again for  
158 another 30-second period. We repeated this procedure for many times to obtain the VSMC  
159 height (Figure 1). The VSMC topography and shape of SHRs showed to be larger and higher  
160 than WKYs ( $p < 0.05$ ) due to  $\alpha$ -SMA over production and F-actin over assembly. The expression  
161 of cytoskeletal actin in SHRs is obviously higher than ( $p < 0.05$ ) WKYs at the same age and the  
162 denser actin filaments make a lot of crosslinking polymers inside VSMCs (Sehgel N. L., et al.,  
163 2013).

### 164 **3.2 Drugs effect on VSMC elasticity**

165 The VSMC elasticity data are consistent with the above topographical observations, and  
166 indicate that the intrinsic property of a single cell reflects its mechanical characteristics. By CD  
167 and ML7 evaluations, the elasticities of VSMCs were dramatically reduced and there were no  
168 significant differences between WKYs and SHRs (Sehgel N. L., et al., 2013). The drug Y27632  
169 ( $5 \mu\text{mol/L}$ ) was performed to treat WKY and SHR VSMCs, VSMC elasticity of SHR showed a  
170

171 higher value in presence of Y27632 in comparison to that of WKYs ( $p < 0.005$ , Figure 2A),  
172 whereas the drug lysophosphatidic acid (LPA) ( $2 \mu\text{mol/L}$ ) increased VSMC elasticity in both  
173 WKYs and SHRs, but to a larger extent in SHR ( $p < 0.001$ , Figure 2A).

174 The time series behavior in VSMC elasticity of WKYs and SHRs with  $10 \mu\text{mol/L}$  CD,  $10$   
175  $\mu\text{mol/L}$  ML7 (Figure 2B),  $5 \mu\text{mol/L}$  Y27632 (Figure 2C) and  $2 \mu\text{mol/L}$  LPA treatments in single  
176 cell level was further investigated by a spectral analysis approach. After  $10 \mu\text{mol/L}$  CD treatment  
177 there were not any significant differences in three components of VSMC elasticity oscillatory  
178 behaviors between WKYs and SHRs. Interestingly, in the second component the amplitude of  
179 WKY was higher than that of SHR ( $p < 0.05$ ) by CD treatment (Figure 3A). Possibly CD  
180 depolymerizes and disrupts actin filaments in SHR cells, and shows a lower amplitude in the  
181 second component. The mechanism will be further revealed. Additionally, ML7 is a drug to  
182 inhibit myosin light chain phosphorylation, and is applied to VSMC to test its effect on SHR and  
183 WKY VSMC elasticity. After  $10 \mu\text{mol/L}$  ML7 treatment, there were also not any significant  
184 differences between WKY and SHR VSMCs in three components of oscillatory behaviors. In  
185 three principle components, the frequencies and amplitudes of both WKYs and SHRs were not  
186 significantly different ( $p > 0.05$ ) (Figure 3B).

187 From an individual cell point of view, SHRs strongly and vehemently responded to both  
188 LPA and Y27632 treatments. The spectral analysis clearly demonstrated the dynamic oscillatory  
189 behaviors in VSMC elasticity that are driven by actin–ECM interactions at the absence and  
190 presence of these two drugs. The drugs activate or inactivate VSMC elastic characters through a  
191 series of cascade responses, thus after drug treatments the frequencies and amplitudes of first  
192 spectral component (large visible oscillation, Figure 3C and D) between SHRs and WKYs  
193 existed significant differences ( $p < 0.05$ ). Moreover, the amplitudes of the second spectral  
194 component between SHRs and WKYs existed significant differences ( $p < 0.05$ ) (Figure 3C and  
195 3D).

196 Rho kinase acts as a signaling molecule to influence VSMC stiffness via the  $\text{Ca}^{2+}$ -CaM-  
197 MLCK pathway and with some cascade cycles by phosphorylation and dephosphorylation. Rho  
198 kinase also regulates aortic VSMC stiffness via actin/ serum response factor (SRF)/myocardin in  
199 hypertension (Zhou N., et al., 2017b). The WKYs and SHRs are at 16-18 weeks of age, from the  
200 prior reports the basal expression level of myosin light chain (MLC) in both WKYs and SHRs  
201 was closed, but the expression of pMLC was found to be increased in SHRs (Sehgel N. L., et al.,

202 2013). The drug Y27632 inhibits Rho kinase to phosphorylate MLCK and dephosphorylates  
203 pMLC, indirectly keeps actin away from binding with myosin to depolymerize the establishment  
204 of actin-myosin complex and eliminates the VSMC elasticity (Pierce G.L. 2017). In addition, the  
205 ECM-integrin-cytoskeletal axis is an important pathway to influence VSMC stiffness by  
206 regulating  $\alpha$ -SMA expression, and the coordinate ability of ECM-integrin-actin is attenuated to  
207 produce hypertension (Zhu Y., et al., 2018 and 2019). The cytoskeletal  $\alpha$ -smooth muscle actin  
208 ( $\alpha$ -SMA) importantly responds mechanical forces through ECM-integrin-cytoskeletal axis to  
209 mediate VSMC stiffness, and it is over expressed to be a decisive factor leading to an increase in  
210 aortic stiffness for inducing hypertension. The  $\alpha$ -SMA expression and polymerization in SHR  
211 VSMCs are obviously higher than WKYs at the same age (Sehgel N. L., et al., 2013).  
212 Attenuating the stiffness of VSMC via several pathways, Y27632 gently damaged the  
213 crosslinking of  $\alpha$ -SMA filaments and the contractility of myosin production in comparison to the  
214 drug CD and ML7, consequently VSMC elasticity of SHRs showed a higher value in presence of  
215 Y27632 in comparison to that of WKYs.

216 The drug lysophosphatidic acid (LPA) activates Rho kinase to phosphorylate MLCK and  
217 promote  $\alpha$ -SMA polymerization (Staiculescu M.C., et al., 2014). Meanwhile, LPA enhances  
218 integrin to adhere to the ECM and activate Rho kinase. Increasing adhesion interaction between  
219  $\alpha 5\beta 1$  integrin and fibronectin (one component of ECM) is related to increasing cell stiffness via  
220 ECM-integrin-cytoskeletal axis, and MLCK was also found to be over expressed in VSMCs of  
221 SHRs (Hong Z.K., et al., 2012 and 2013; Sehgel N. L., et al., 2013 and 2015a). LPA increases  
222  $\alpha 5\beta 1$  integrin to adhere to ECM for promoting actin expression and polymerization. The  
223 interaction between  $\alpha 5\beta 1$  integrin and FN is specific and important in the mechanical  
224 transduction of VSMC, and  $\alpha 5\beta 1$  integrin is the major receptor for FN (Sun Z., et al., 2005; Wu  
225 X., et al., 1998 and 2001). The  $\alpha 5\beta 1$  integrin provides the bio-mechanical linkage between  $\alpha$ -  
226 SMA and fibronectin (FN) in extracellular space, and  $\alpha$ -SMA responds the bio-mechanical  
227 forces through integrin-mediated cell-ECM interactions to alternate cytoskeleton system of  
228 VSMCs (Hartman C.D., et al., 2016; Hays T.T., et al., 2018 ). The ECM-integrin-cytoskeletal  
229 axis and the contractility of myosin production are two independent pathways to regulate the  
230 VSMC stiffness (Huang H., et al., 2018). The  $\alpha$ -SMA was highly expressed in the VSMC of  
231 SHRs, moreover, MLCK was also found to be over expressed in SHRs to stiffen the VSMC due



232 to enhancing the VSMC contractile process (Rodenbeck S.D., et al., 2017), thus this analysis  
233 showed VSMC elastic moduli of SHRs were greater than ( $p < 0.05$ ) those of WKYs.

234 Previous studies have shown that both internal and external biomechanical forces can act  
235 through the cytoskeleton, thereby affecting local elasticity and cell behavior (Fletcher D.A., et  
236 al., 2010). The differences in stiffness and time-dependent oscillations were largely influenced  
237 by actin cytoskeletal dynamics. Dynamical alternation of  $\alpha$ -SMA constructs different high-level  
238 linkage structures in VSMCs, affecting cell elasticity and cellular stress relaxation behavior (Sun  
239 Z., et al., 2008 and 2012; Wu X., et al., 2010). To further verify the internal characteristics of  
240 cells that reflect the mechanical properties of cells, various drug treatments that affect the  
241 cytoskeleton and corresponding vascular smooth muscle contraction mechanisms have been  
242 carried out on VSMCs for in-depth research. Three spectral components are determined in the  
243 oscillation mode, so it is reasonable to assume that more than one mechanism causes the  
244 spontaneous oscillation of cell elasticity, and therefore may play a role in the increased vascular  
245 stiffness observed in hypertension. The elastic oscillations of VSMCs represent the inherent  
246 characteristics of cells and involve the cytoskeleton structure responsible for the interaction of  
247 actin-ECM and actin-myosin. At the same time, the oscillation of VSMC elasticity reveals the  
248 polymerization and depolymerization of  $\alpha$ -SMA. Different pharmacological mechanisms  
249 produced the different individual cell elastic behavior after the drug treatments. Spectral analysis  
250 showed that compared with WKY rats, SHRs usually have lower frequencies and larger  
251 amplitudes. The general pattern of slow, larger oscillations in SHRs and faster, smaller  
252 oscillations in WKY VSMCs (Sehgel N. L., et al., 2013). After Y27632 treatment, the frequency  
253 of the first wave component is significantly reduced in SHR VSMCs, whereas the amplitudes of  
254 the first and second wave components are increased in SHR VSMCs. The frequency and  
255 amplitude showed not to be a significant difference between WKY and SHR VSMCs in the third  
256 wave component. All in all, the spectral analysis indicated that Y27632 gently attenuated VSMC  
257 stiffness. The drug LPA polymerizes  $\alpha$ -SMA to increase VSMC stiffness, from the spectral  
258 analysis the amplitudes of all three wave components are enhanced in SHR VSMCs, and the  
259 frequencies of the first and second wave components are significantly reduced in comparison to  
260 WKY VSMCs. The drug CD breaks apart the actin cytoskeletal network and the drug ML7  
261 dephosphorylates myosin light chain to block the interaction between actin and myosin. These  
262 two drugs CD and ML7 strongly and irreversibly destroy the cross-linking of actin filaments and

263 the contractility produced by myosin. Both WKYs and SHRs completely lose their elasticity, and  
264 therefore exhibit inactivity in the three components of the oscillation.

265 In summary, cellular mechanisms underlying differences in VSMC stiffness were  
266 investigated using AFM. For decades, pharmacists have developed many drugs for the treatment  
267 of certain vascular diseases based on the role of the actin-integrin axis in the mechanical  
268 properties of VSMCs, and AFM provides a way to manipulate an individual VSMC due to its  
269 nano-sensitivity under physiological condition and liquid environment. At present, people have  
270 used AFM in many applications to study the mechanical properties of a single VSMC, and the  
271 intrinsic changes of VSMC enable people to open up new therapeutic ways for the treatment of  
272 multiple diseases and update our understanding of vascular biology (Nance M.E., et al., 2015;  
273 Pierce G.L. 2017). The future trends of employing AFM tip coating techniques for adhesive  
274 assessment and super-resolution fluorescence microscopy for cytoskeletal tracking will further  
275 resolve individual VSMC elasticity and its role in physiological process of living organisms (Ella  
276 S.R., et al., 2010). The *in vivo* mechanism of how individual VSMC elasticity to regulate  
277 vascular processes is still unknown, thus the AFM detection *in vitro* combined with the  
278 investigation *in vivo* by other techniques will also provide a perspective view to describe the  
279 VSMC elastic characters in the coming researches (Lacolley P., et al., 2017 and 2018).

#### 280 **4. References**

281 Dhar S., Sun Z., Meininger G.A., Hill M.A. (2017). Nonenzymatic glycation interferes with  
282 fibronectin-integrin interactions in vascular smooth muscle cells. *Microcirculation*, 24(3),  
283 e12347 (1-15).

284 Ella S.R., Yang Y., Clifford P.S., Gulia J., Dora K.A., Meininger G.A., Davis M.J. , Hill M.A.  
285 (2010). Development of an Image-Based System for Measurement of Membrane Potential,  
286 Intracellular Ca<sup>2+</sup> and Contraction in Arteriolar Smooth Muscle Cells. *Microcirculation*, 17(8),  
287 629-640.

288 Fletcher D.A., Mullins R.D. (2010). Cell mechanics and cytoskeleton. *Nature*, 463(7280), 485-  
289 492.

290 Hays T.T., Ma B., Zhou N., Stoll S., Pearce W.J., Qiu H. (2018). Vascular smooth muscle cells  
291 direct extracellular dysregulation in aortic stiffening of hypertensive rats. *Aging Cell*, 17(3),  
292 e12748 (1-13).

293 Hill M.A., Meininger G.A. (2016). Small artery mechanobiology: roles of cellular and non-  
294 cellular elements. *Microcirculation*, 23(8), 611–613.

- 295 Hong Z., Sun Z., Li Z., Mesquitta W.T., Trzeciakowski J.P., Meininger G.A. (2012).  
296 Coordination of fibronectin adhesion with contraction and relaxation in microvascular smooth  
297 muscle. *Cardiovascular Research*, 96(1), 73-80.
- 298 Hong Z., Sun Z., Li M., Li Z., Bunyak F., Ersoy I., Trzeciakowski J.P., Staiculescu M.C., Jin M.,  
299 Martinez-Lemus L., Hill M.A., Palaniappan K., Meininger G.A. (2014). Vasoactive agonists  
300 exert dynamic and coordinated effects on vascular smooth muscle cell elasticity, cytoskeletal  
301 remodelling and adhesion. *Journal of Physiology*, 592(6), 1249-1266.
- 302 Hong Z., Reeves K.J., Sun Z., Li Z., Brown N.J., Meininger G.A. (2015). Vascular smooth  
303 muscle cell stiffness and adhesion to collagen I modified by vasoactive agonists. *PloS One*,  
304 10(3), e0119533.  
305
- 306 Huang H., Sun Z., Hill M.A., Meininger G.A. (2018). A calcium mediated mechanism  
307 coordinating vascular smooth muscle cell adhesion during KCl activation. *Frontiers in*  
308 *Physiology*, 9, a1810 (1-13).  
309
- 310 Jia G., Habibi J., DeMarco V.G., Martinez-Lemus L.A., Ma L., Whaley-Connell A.T., Aroor  
311 A.R., Domeier T.L., Zhu Y., Meininger G.A., Mueller K.B., Jaffe I.Z., Sowers J.R. (2015).  
312 Endothelial Mineralocorticoid Receptor Deletion Prevents Diet-Induced Cardiac Diastolic  
313 Dysfunction in Females. *Hypertension*, 66(6), 1159-1167.
- 314 Lacolley P., Regnault V., Segers P., Laurent S. (2017). Vascular smooth muscle cells and arterial  
315 stiffening: relevance in development, aging, and disease. *American Journal of Physiology –*  
316 *Physiological Reviews*, 97(4), 1555-1617.
- 317 Lacolley P., Regnault V., Avolio A.P. (2018). Smooth muscle cell and arterial aging: basic and  
318 clinical aspects. *Cardiovascular Research*, 114(4), 513-528.
- 319 Leloup A.J.A., Van Hove C.E., De Moudt S., De Meyer G.R.Y., De Keulenaer G.W., Franssen P.  
320 (2019). Vascular smooth muscle cell contraction and relaxation in the isolated aorta: a critical  
321 regulator of large artery compliance. *Physiological Reports*, 7(4), e13934 (1-13).
- 322 Li N., Sanyour H., Remund T., Kelly P., Hong Z. (2018). Vascular extracellular matrix and  
323 fibroblasts-coculture directed differentiation of human mesenchymal stem cells toward smooth  
324 muscle-like cells for vascular tissue engineering. *Materials Science and Engineering: C*, 93(1),  
325 61-69.  
326
- 327 Martinez-Lemus L.A., Hill M.A., Meininger G.A. (2009). The plastic nature of the vascular wall:  
328 a continuum of remodeling events contributing to control of arteriolar diameter and structure.  
329 *Physiology (Bethesda)*, 24 (1), 45-57.
- 330 Nance M.E., Whitfield J.T., Zhu Y., Gibson A.K., Hanft L.M., Campbell K.S., Meininger G.A.,  
331 McDonald K.S., Segal S.S., Domeier T.L. (2015). Attenuated sarcomere lengthening of the aged

- 332 murine left ventricle observed using two-photon fluorescence microscopy. *American Journal of*  
333 *Physiology-Heart and Circulatory Physiology*, 309(5), H918-H925.
- 334 Pierce G.L. (2017). Mechanisms and subclinical consequences of aortic stiffness. *Hypertension*,  
335 70(5), 848-853.
- 336
- 337 Qiu H., Zhu Y., Sun Z., Trzeciakowski J.P., Gansner M., Depre C., Resuello R.R., Natividad  
338 F.F., Hunter W.C., Genin G.M., Elson E.L., Vatner D.E., Meininger G.A., Vatner S.F. (2010).  
339 Short communication: vascular smooth muscle cell stiffness as a mechanism for increased aortic  
340 stiffness with aging. *Circulation Research*, 107(5), 615-619.
- 341 Rickel A.P., Sanyour H. J., Leyda N.A., Hong Z.H. (2020). Extracellular Matrix Proteins and  
342 Substrate Stiffness Synergistically Regulate Vascular Smooth Muscle Cell Migration and  
343 Cortical Cytoskeleton Organization. *ACS Applied Bio Materials*, 3(4), 2360-2369.
- 344 Rodenbeck S.D., Zarse C.A., McKenney-Drake M.L., Bruning R.S., Sturek M., Chen N.X., Moe  
345 S.M. (2017). Intracellular calcium increases in vascular smooth muscle cells with progression of  
346 chronic kidney disease in a rat model. *Nephrology Dialysis Transplantation*, 32(3), 450-458.
- 347 Sanyour H., Childs J., Meininger G.A., Hong Z. (2018). Spontaneous oscillation in cell adhesion  
348 and stiffness measured using atomic force microscopy. *Scientific Report*, 8(1), a2899 (1-10).
- 349 Sanyour H.J., Li N., Rickel A.P., Childs J.D., Kinser C.N., Hong Z.K. (2019). Membrane  
350 cholesterol and substrate stiffness coordinate to induce the remodeling of the cytoskeleton and  
351 the alteration in the biomechanics of vascular smooth muscle cells. *Cardiovascular Research*,  
352 115(8), 1369-1380.
- 353
- 354 Sanyour H.J., Li N., Rickel A.P., Torres H.M., Anderson R.H., Miles M.R., Childs J.D., Francis  
355 K.R., Tao J.N., Hong Z.K. (2020). Statin mediated cholesterol depletion exerts coordinated  
356 effects on the alterations in rat vascular smooth muscle cell biomechanics and migration. *The*  
357 *Journal of Physiology*, 598(8), 1505-1522.
- 358
- 359 Sehgel N. L., Zhu Y., Sun Z., Trzeciakowski J.P., Hong Z.K., Hunter W. C., Vatner D. E.,  
360 Meininger G. A., Vatner S. F. (2013). Increased vascular smooth muscle cell stiffness: a novel  
361 mechanism for aortic stiffness in hypertension. *American Journal of Physiology - Heart and*  
362 *Circulatory Physiology*, 305(9), H1281-H1287.
- 363 Sehgel N.L., Sun Z., Hong Z., Hunter W.C., Hill M.A., Vatner D.E., Vatner S.F., Meininger  
364 G.A. (2015a). Augmented vascular smooth muscle cell stiffness and adhesion when  
365 hypertension is superimposed on aging. *Hypertension*, 65(2), 370-377.
- 366 Sehgel N.L., Vatner S.F., Meininger G.A. (2015b). “Smooth Muscle Cell Stiffness Syndrome”—  
367 Revisiting the Structural Basis of Arterial Stiffness. *Frontiers in Physiology*, 6, a00335 (1-15).

- 368 Shen K., Kenche H., Zhao H., Li J., Stone J. (2019). The role of extracellular matrix stiffness in  
369 regulating cytoskeletal remodeling via vinculin in synthetic smooth muscle cells. *Biochemical*  
370 *and Biophysical Research Communications*, 508(1), 302-307.
- 371
- 372 Staiculescu M.C., Ramirez-Perez F.I., Castorena-Gonzalez J.A., Hong Z., Sun Z., Meininger  
373 G.A., Martinez-Lemus L.A. (2014). Lysophosphatidic acid induces integrin activation in  
374 vascular smooth muscle and alters arteriolar myogenic vasoconstriction. *Frontiers in Physiology*,  
375 5, a00413 (1-12).
- 376
- 377 Sun Z., Martinez-Lemus L.A., Trache A., Trzeciakowski J.P., Davis G.E., Pohl U., Meininger  
378 G.A. (2005). Mechanical properties of the interaction between fibronectin and  $\alpha 5\beta 1$ -integrin on  
379 vascular smooth muscle cells studied using atomic force microscopy. *American Journal of*  
380 *Physiology -Heart and Circulatory Physiology*, 289 (6), H2526-H2535.
- 381
- 382 Sun Z., Martinez-Lemus L.A., Hill M.A., Meininger G.A. (2008). Extracellular matrix-specific  
383 focal adhesions in vascular smooth muscle produce mechanically active adhesion sites. *American*  
384 *Journal of Physiology-Cell Physiology*, 295 (1), C268-C278.
- 385
- 386 Sun Z., Li Z., Meininger G.A. (2012). Mechanotransduction through fibronectin-integrin focal  
387 adhesion in microvascular smooth muscle cells: is calcium essential? *American Journal of*  
388 *Physiology - Heart and Circulatory Physiology*, 302(10), H1965-H1973.
- 389
- 390 Touyz R.M., Alves-Lopes R., Rios F.J., Camargo L.L., Anagnostopoulou A., Arner A.,  
391 Montezano A.C. (2018). Vascular smooth muscle contraction in hypertension. *Cardiovascular*  
*Research*, 114(4), 529-539.
- 392
- 393 Turner C.J., Badu-Nkansah K., Crowley D., van der Flier A., Hynes R.O. (2015).  $\alpha 5$  and  $\alpha v$   
394 integrins cooperate to regulate vascular smooth muscle and neural crest functions in vivo.  
*Development*, 142(4), 797-808.
- 395
- 396 Wu X., Mogford J.E., Platts S.H., Davis G.E., Meininger G.A., Davis M.J. (1998). Modulation  
397 of calcium current in arteriolar smooth muscle by  $\alpha v\beta 3$  and  $\alpha 5\beta 1$  integrin ligands. *Journal of*  
398 *Cell Biology*, 143(1), 241-252.
- 399
- 400 Wu X., Davis G.E., Meininger G.A., Wilson E., Davis M.J. (2001). Regulation of the L-type  
401 Calcium Channel by  $\alpha 5\beta 1$  Integrin Requires Signaling between Focal Adhesion Proteins.  
402 *Journal of Biological Chemistry*, 276 (32), 30285-30292.
- 403
- 404 Wu X., Sun Z., Foskett A., Trzeciakowski J.P., Meininger G.A., Muthuchamy M. (2010).  
405 Cardiomyocyte contractile status is associated with differences in fibronectin and integrin  
406 interactions. *American Journal of Physiology -Heart and Circulatory Physiology*, 298 (6),  
407 H2071-H2081.
- 408
- 409 Yang, J., Jin, K., Xiao, J., Ma, J., and Ma, D. (2017). Endogenous tissue factor pathway inhibitor  
410 in vascular smooth muscle cells inhibits arterial thrombosis. *Frontiers of Medicine*, 11, 403–  
409.

- 411 Zhang J., Zhao X., Vatner D.E., McNulty T., Bishop S., Sun Z., Shen Y.T., Chen L., Meininger  
412 G.A., Vatner S.F. (2016). Extracellular Matrix Disarray as a Mechanism for Greater Abdominal  
413 Versus Thoracic Aortic Stiffness With Aging in Primates. *Arteriosclerosis, Thrombosis, and*  
414 *Vascular Biology*, 36(4), 700-706.
- 415 Zhou N., Lee J.J., Stoll S., Ma B., Wiener R., Wang C., Costa K.D., Qiu H. (2017a). Inhibition  
416 of SRF/myocardin reduces aortic stiffness by targeting vascular smooth muscle cell stiffening in  
417 hypertension. *Cardiovascular Research*, 113: 171- 182.
- 418 Zhou N., Lee J.-J., Stoll S., Ma B., Costa K.D., Qiu H. (2017b). Rho Kinase Regulates Aortic  
419 Vascular Smooth Muscle Cell Stiffness Via Actin/SRF/Myocardin in Hypertension. *Cellular*  
420 *Physiology and Biochemistry*, 44, 701-715.
- 421 Zhou Z., Qu J., He L., Yang S., Zhang F., Guo T., Peng H., Chen P., Zhou Y. (2020). Stiff  
422 matrix instigates type I collagen biogenesis by mammalian cleavage factor I complex-mediated  
423 alternative polyadenylation. *JCI insight*, 5(3), e133972 (1-15).
- 424 Zhu W., Kim B.C., Wang M., Huang J., Isak A., Bexiga N.M., Monticone R., Ha T., Lakatta  
425 E.G., An S.S. (2018). TGF $\beta$ 1 reinforces arterial aging in the vascular smooth muscle cell through  
426 a long-range regulation of the cytoskeletal stiffness. *Scientific Report*, 8(1), a2668 (1-12).
- 427 Zhu Y., Qiu H., Trzeciakowski J.P., Sun Z., Li Z., Hong Z., Hill M.A., Hunter W.C., Vatner  
428 D.E., Vatner S.F., Meininger G.A. (2012). Temporal analysis of vascular smooth muscle cell  
429 elasticity and adhesion reveals oscillation waveforms that differ with aging. *Aging Cell*, 11(5),  
430 741-750.
- 431 Zhu Y., He L., Qu J., Zhou Y. (2018). Regulation of Vascular Smooth Muscle Cell Stiffness and  
432 Adhesion by  $[Ca^{2+}]_i$ : an Atomic Force Microscopy-Based Study. *Microscopy and Microanalysis*,  
433 24(6), 708-712.  
434
- 435 Zhu Y., Qu J., Zhang F., Zhou Z, Yang S., Zhou Y. (2019). Calcium in Vascular Smooth Muscle  
436 Cell Elasticity and Adhesion: Novel Insights into the Mechanism of Action. *Frontiers in*  
437 *Physiology*, 10, a00852 (1-8).
- 438

439 **Figure Legends**

440

441 **Figure1. Topographic characterizations of WKY and SHR VSMCs.** (A) Example of WKY  
442 TA (left) and SHR TA VSMC (right) AFM deflection image. (B) Scanning height data of WKY  
443 TA (n=5, from 3 rats) and SHR TA (n=5, from 3 rats). \*\*p<0.01 (SHR TA VSMC compared to  
444 WKY TA VSMC in different time regions).

445

446 **Figure2.** (A) VSMCs were treated with 5 $\mu$ mol/L Y27632 to inhibit the ROCK, with 2  $\mu$ mol/L  
447 LPA to increase integrin adhesion to ECM for 30 minute measurement. \*\*P<0.005 (WKY vs.  
448 SHR), \*\*\*P<0.001(WKY vs. SHR). (B) Examples of real-time cell elastic modulus for typical  
449 WKY (blue) and SHR (red) vascular smooth muscle cells using 10 $\mu$ mol/L ML7 treatment and  
450 (C) 5 $\mu$ mol/L Y27632 treatment are shown.

451

452 **Figure3. Over a 30 minute period, mathematical analysis of the elastic modulus waveform**  
453 **in the presence of drugs indicated three principle components of oscillation by spectral**  
454 **analysis for WKY and SHR thoracic aorta vascular smooth muscle cells.** (A) WKYs (5 cells  
455 from 3 animals) and SHRs (4 cells from 3 animals) treated by 10  $\mu$ M CD. (B) WKYs (9 cells  
456 from 3 animals) and SHRs (5 cells from 3 animals) treated by 10  $\mu$ M ML7. (C) WKYs (5 cells  
457 from 3 animals) and SHRs (6 cells from 3 animals) treated by 5 $\mu$ M Y27632. (D) WKYs (5 cells  
458 from 3 animals) and SHRs (5 cells from 3 animals) treated by 2  $\mu$ M LPA. F\* and A\* indicate  
459 that the frequency and amplitude of the component were significantly different from WKYs and  
460 SHRs in the presence of drugs,  $P < 0.05$ .

461

462

463

464

465

**Figure1**

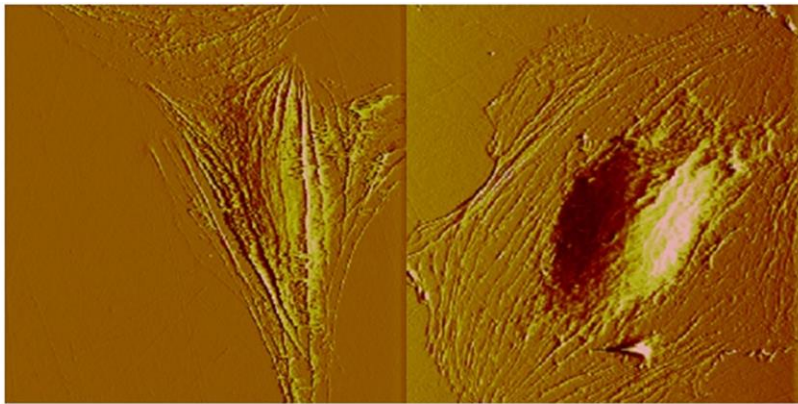

(A)

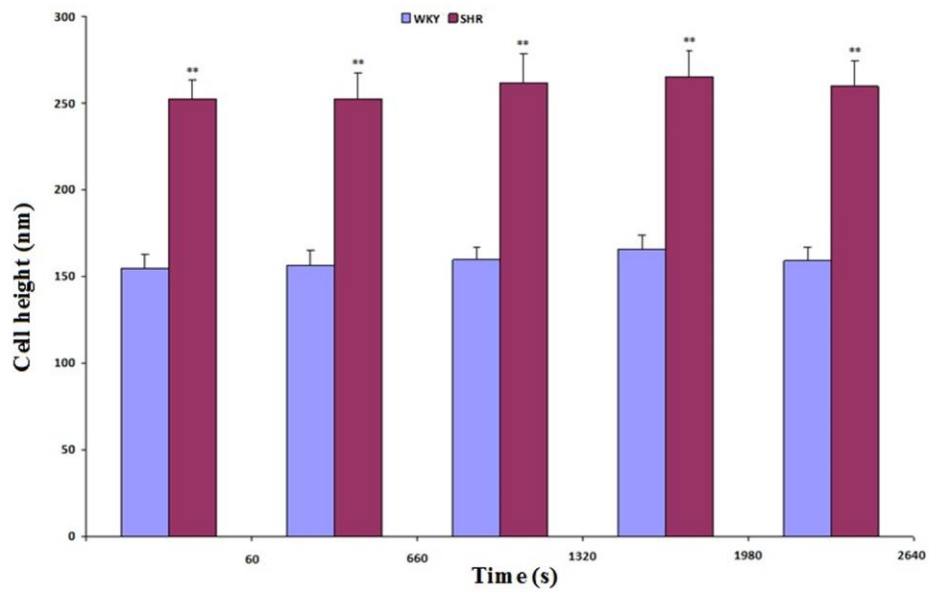

(B)

466

467

468

469

470

471

472



473

Figure2

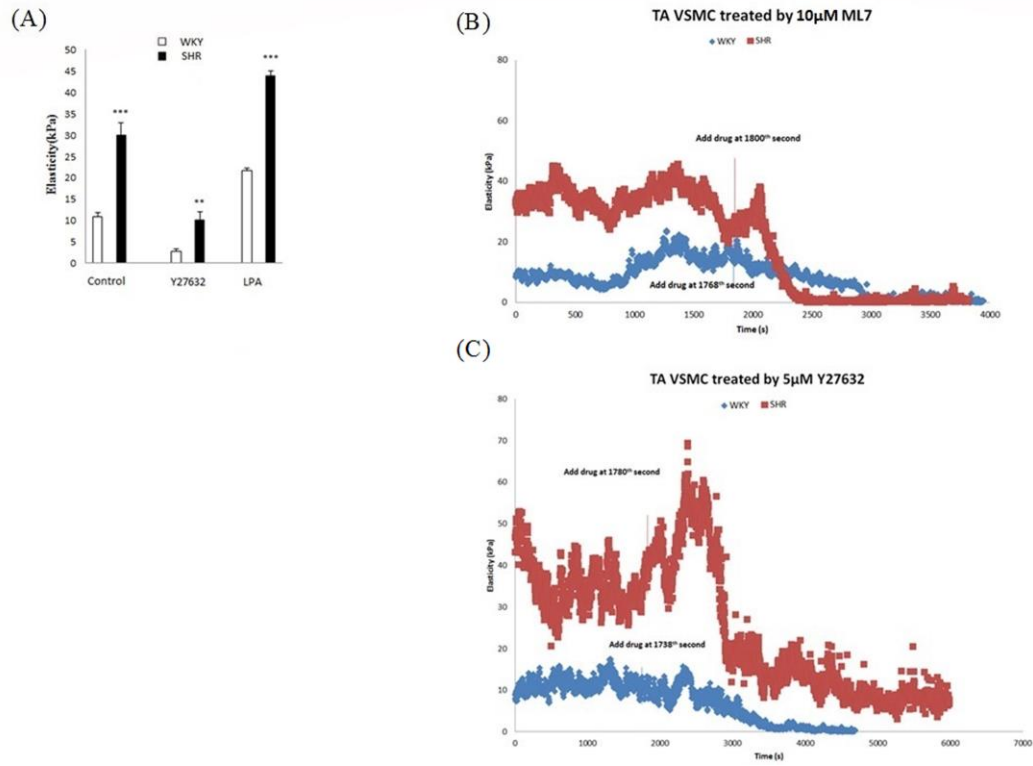

474

475

476

477

478

479

480

481

482

483

484

Figure3

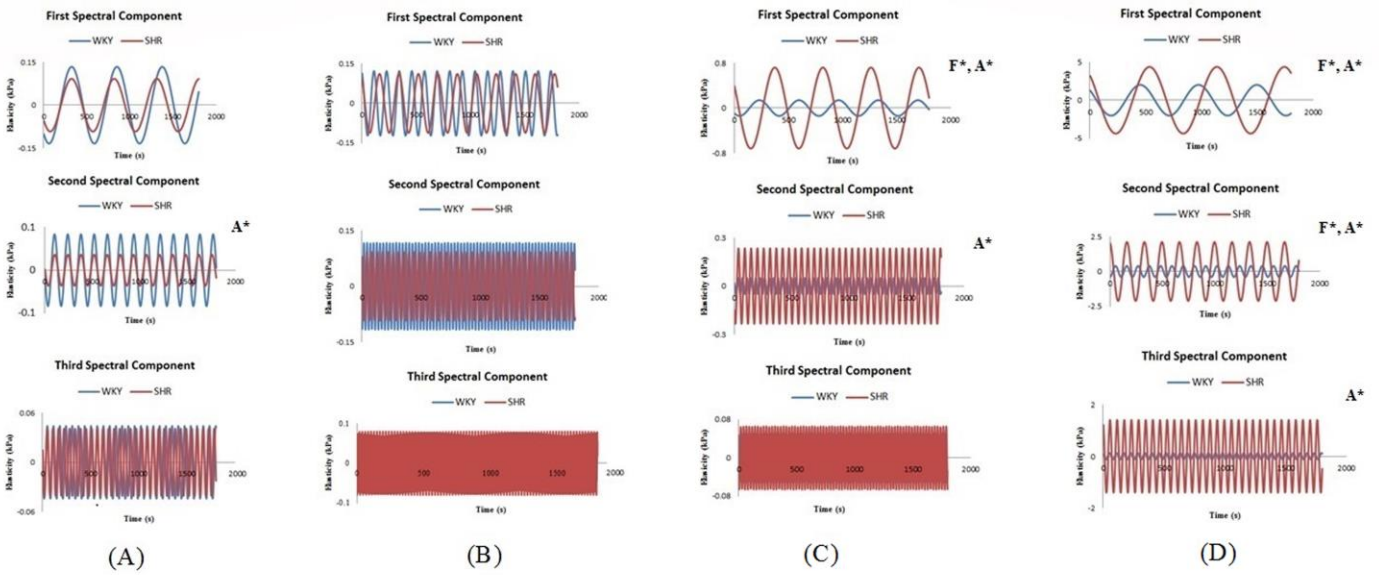

485
